# Supplementary material
Source: HighWire-hosted journal article supplement (https://bmjopen.bmj.com/content/10/5/e035953)
Supplement: inline-supplementary-material-1 [file inline-supplementary-material-1.pdf]

**Association of dietary vitamin K and risk of coronary heart disease in middle-age adults. The Hordaland Health Study Cohort.**

Teresa R Haugsgjerd, MSc<sup>1</sup>, Grace M Egeland, PhD<sup>1,2</sup>, Ottar K Nygård, MD PhD<sup>3,4</sup>, Kathrine J Vinknes, PhD<sup>5</sup>, Gerhard Sulo, MD PhD<sup>6,7</sup>, Vegard Lysne, PhD<sup>4</sup>, Jannicke Igland, PhD<sup>1</sup>, Grethe S Tell, PhD<sup>1,8</sup>

<sup>1</sup>Department of Global Public Health and Primary Care, University of Bergen, Bergen, Norway

<sup>2</sup>Health Registries, Research and Development, Norwegian Institute of Public Health, Bergen, Norway

<sup>3</sup>Department of Heart Disease, Haukeland University Hospital, Bergen, Norway

<sup>4</sup>Centre for nutrition, Department of Clinical Science, University of Bergen, Bergen, Norway

<sup>5</sup>Institute of Basic Medical Sciences, Faculty of Medicine, University of Oslo, Oslo, Norway

<sup>6</sup>Centre for Disease Burden, The Norwegian Institute of Public Health, Bergen, Norway

<sup>7</sup>Oral Health Centre of Expertise in Western Norway, Bergen, Norway

<sup>8</sup>Division of Mental and Physical Health, Norwegian Institute of Public Health, Bergen, Norway

**Correspondence**

Teresa Risan Haugsgjerd

Teresa.Haugsgjerd@uib.no

Phone: +47 40634711

Supplementary table 1 Associations between intake of energy-adjusted vitamin K1 and K2 and incident coronary heart disease (CHD)<sup>a</sup>. Sex-specific quartiles with 1279 men and 1708 women. Missing data are imputed with multiple imputation.<sup>b</sup> The Hordaland Health Study (HUSK).

| Exposure                        | Intake, µg/day mean (SD) | N    | CHD, N(%) | Model 1 HR (95% CI) <sup>c</sup><br>N = 2987 | Model 2 HR (95% CI) <sup>d</sup><br>N = 2987 | Model 3 HR (95% CI) <sup>e</sup><br>N = 2987 |
|---------------------------------|--------------------------|------|-----------|----------------------------------------------|----------------------------------------------|----------------------------------------------|
| Vitamin K1                      |                          |      |           |                                              |                                              |                                              |
|                                 |                          | 2987 | 112       |                                              |                                              |                                              |
| Q1                              | 63 (25)                  | 746  | 33 (4.4)  | 1 (ref)                                      | 1 (ref)                                      | 1 (ref)                                      |
| Q2                              | 83 (27)                  | 747  | 18 (2.4)  | 0.47 (0.27 to 0.85)                          | 0.49 (0.27 to 0.87)                          | 0.47 (0.26 to 0.84)                          |
| Q3                              | 122 (32)                 | 748  | 31 (4.1)  | 0.84 (0.51 to 1.39)                          | 0.83 (0.50 to 1.36)                          | 0.77 (0.47 to 1.27)                          |
| Q4                              | 269 (191)                | 746  | 30 (4.0)  | 0.91 (0.55 to 1.49)                          | 0.93 (0.56 to 1.53)                          | 0.71 (0.40 to 1.25)                          |
| <i>P</i> for trend <sup>f</sup> |                          |      |           | 0.64                                         | 0.60                                         | 0.60                                         |
| Continuous, Per 10 µg           |                          |      |           | 1.00 (0.99 to 1.02),<br><i>p</i> = 0.57      | 1.00 (0.99 to 1.02),<br><i>p</i> = 0.61      | 0.99 (0.97 to 1.01),<br><i>p</i> = 0.26      |
| Vitamin K2                      |                          |      |           |                                              |                                              |                                              |
|                                 |                          | 2987 | 112       |                                              |                                              |                                              |
| Q1                              | 10 (4)                   | 746  | 35 (4.7)  | 1 (ref)                                      | 1 (ref)                                      | 1 (ref)                                      |
| Q2                              | 13 (4)                   | 747  | 30 (4.0)  | 0.79 (0.48 to 1.29)                          | 0.80 (0.49 to 1.31)                          | 0.86 (0.52 to 1.42)                          |
| Q3                              | 17 (4)                   | 747  | 29 (3.9)  | 0.77 (0.47 to 1.26)                          | 0.79 (0.48 to 1.30)                          | 0.90 (0.52 to 1.53)                          |
| Q4                              | 26 (8)                   | 747  | 18 (2.4)  | 0.50 (0.28 to 0.88)                          | 0.50 (0.28 to 0.88)                          | 0.60 (0.30 to 1.19)                          |
| <i>P</i> for trend <sup>f</sup> |                          |      |           | 0.02                                         | 0.02                                         | 0.17                                         |
| Continuous, Per 10 µg           |                          |      |           | 0.71 (0.50 to 0.99),<br><i>p</i> = 0.04      | 0.70 (0.50 to 0.98),<br><i>p</i> = 0.04      | 0.80 (0.52 to 1.25),<br><i>p</i> = 0.33      |

<sup>a</sup>HR are presented as Q2 vs. Q1, Q3 vs. Q1, Q4 vs. Q1.

<sup>b</sup>Missing values for physical activity, smoking and education were imputed using ordinal logistic regression as the imputation model in MICE (multiple imputation using chained equation) with 20 imputations.

<sup>c</sup> Cox proportional hazards regression analysis adjusted for age, sex and total energy intake.

<sup>d</sup>Adjusted in addition for physical activity, smoking and education.

<sup>e</sup> Vitamin K1 is adjusted in addition for energy-adjusted fiber and folate, while vitamin K2 is adjusted in addition for energy-adjusted calcium and saturated fatty acids.

<sup>f</sup>P – trend, to test for linear trends across quartiles, we modelled the median intake of each quartile as a continuous variable.

SD, standard deviation; N, number of participants; CHD, incident coronary heart disease; HR, hazard ratio; CI, confidence interval; Q, quartile

Supplementary table 2 Associations between intake of absolute (not energy adjusted) vitamin K1 and K2 and incident coronary heart disease (CHD)<sup>a</sup>. Sex-specific quartiles with 1279 men and 1708 women. The Hordaland Health Study (HUSK).

| Dietary intake                  | Intake,<br>μg/day<br>mean (SD) | N    | CHD, N(%) | Model 1<br>HR (95% CI) <sup>b</sup><br>N = 2987 | Model 2<br>HR (95% CI) <sup>c</sup><br>N = 2792 <sup>e</sup> | Model 3<br>HR (95% CI) <sup>d</sup><br>N = 2792 <sup>e</sup> |
|---------------------------------|--------------------------------|------|-----------|-------------------------------------------------|--------------------------------------------------------------|--------------------------------------------------------------|
| Vitamin K1                      |                                |      |           |                                                 |                                                              |                                                              |
|                                 |                                | 2987 | 112       |                                                 |                                                              |                                                              |
| Q1                              | 51 (13)                        | 747  | 34 (4.6)  | 1 (ref)                                         | 1 (ref)                                                      | 1 (ref)                                                      |
| Q2                              | 86 (10)                        | 747  | 26 (3.5)  | 0.89 (0.52 to 1.50)                             | 0.97 (0.55 to 1.71)                                          | 0.92 (0.52 to 1.62)                                          |
| Q3                              | 127 (16)                       | 747  | 26 (3.5)  | 0.94 (0.54 to 1.62)                             | 0.97 (0.54 to 1.74)                                          | 0.86 (0.47 to 1.55)                                          |
| Q4                              | 274 (188)                      | 746  | 26 (3.5)  | 1.03 (0.58 to 1.84)                             | 1.04 (0.55 to 1.96)                                          | 0.72 (0.35 to 1.48)                                          |
| <i>P</i> for trend <sup>f</sup> |                                |      |           | 0.79                                            | 0.87                                                         | 0.37                                                         |
| Continuous, Per 10 μg           |                                |      |           | 1.00 (0.99 to 1.02),<br><i>p</i> = 0.57         | 1.00 (0.99 to 1.02),<br><i>p</i> = 0.62                      | 0.99 (0.97 to 1.01),<br><i>p</i> = 0.27                      |
| Vitamin K2                      |                                |      |           |                                                 |                                                              |                                                              |
|                                 |                                | 2987 | 112       |                                                 |                                                              |                                                              |
| Q1                              | 9 (2)                          | 749  | 33 (4.4)  | 1 (ref)                                         | 1 (ref)                                                      | 1 (ref)                                                      |
| Q2                              | 13 (2)                         | 745  | 35 (4.7)  | 1.15 (0.70 to 1.87)                             | 1.27 (0.75 to 2.17)                                          | 1.38 (0.80 to 2.40)                                          |
| Q3                              | 18 (2)                         | 748  | 27 (3.6)  | 0.94 (0.54 to 1.62)                             | 1.00 (0.56 to 1.78)                                          | 1.21 (0.64 to 2.29)                                          |
| Q4                              | 27 (7)                         | 745  | 17 (2.3)  | 0.62 (0.32 to 1.22)                             | 0.72 (0.36 to 1.45)                                          | 0.97 (0.41 to 2.28)                                          |
| <i>P</i> for trend <sup>f</sup> |                                |      |           | 0.12                                            | 0.25                                                         | 0.83                                                         |
| Continuous, Per 10 μg           |                                |      |           | 0.71 (0.50 to 0.99),<br><i>p</i> = 0.04         | 0.74 (0.52 to 1.05),<br><i>p</i> = 0.09                      | 0.82 (0.51 to 1.30),<br><i>p</i> = 0.39                      |

<sup>a</sup>HRs are presented as Q2 vs. Q1, Q3 vs. Q1, Q4 vs. Q1.

<sup>b</sup>Cox proportional hazards regression analysis adjusted for age, sex and total energy intake.

<sup>c</sup>Adjusted in addition for physical activity, education and smoking habits.

<sup>d</sup> Vitamin K1 is adjusted in addition for energy-adjusted fiber and folate, while vitamin K2 is adjusted in addition for energy-adjusted calcium and saturated fatty acids.

<sup>e</sup> Analyses were based on a reduced number of participants (n=2792) and CHD events (n=100) due to listwise deletion when covariates were missing.

<sup>f</sup> P – trend, to test for linear trends across quartiles, we modelled the median intake of each quartile as a continuous variable.

SD, standard deviation; N, number of participants; CHD, incident coronary heart disease; HR, hazard ratio; CI, confidence interval; Q, quartile
